# Supplementary material for: Cytokine Disturbances in Coronary Artery Ectasia Do Not Support Atherosclerosis Pathogenesis
Source: MDPI journal article supplement (doi:10.3390/ijms19010260), 2018-01-16
Supplement: s1 [file s1]

**Supplementary Table S1.** This table helps to understand the origin, target and function of each cytokines in the cohort. Th1 = T helper 1 cells, Th2 = T helper 2 cells. SMC = smooth muscles cells, NK = natural killer cells, EC = endothelial cells, IFN = interferon.

| Cytokine                                                | Cellular origin                         | Cell intention                                                  | Cellular properties and actions                                                                                                                                     |
|---------------------------------------------------------|-----------------------------------------|-----------------------------------------------------------------|---------------------------------------------------------------------------------------------------------------------------------------------------------------------|
| <i>I-Equal Levels (median and interquartile)</i>        |                                         |                                                                 |                                                                                                                                                                     |
| IL-10 (pg./ml)                                          | Macrophages, Th2, B cells, mast cells   | Macrophages, T & B cells                                        | Anti inflammatory, inhibits Th1, Promotes proliferation and differentiation of regulatory T cells                                                                   |
| IL-12p (sub-unit)<br>IL-12 and IL-23 (pg./ml)           | Th1 cells                               | T cells, macrophages                                            | Proinflammatory; promotes NK and cytotoxic lymphocyte activity; induces IFN- $\gamma$                                                                               |
| IL-13 (pg./ml)                                          | Th2 cells                               | B cells                                                         | Activation of Ig transcription                                                                                                                                      |
| <i>II- Reduced levels (median and interquartile)</i>    |                                         |                                                                 |                                                                                                                                                                     |
| IL-2 (pg./ml)                                           | Activated T cells                       | Macrophages, T & B cells, NK cells                              | T-cell growth factor, stimulates NK activity, stimulates Treg cells                                                                                                 |
| IL-4 (pg./ml)                                           | Th2 cells, mast cells                   | T & B cells, mast cells, macrophages, hematopoietic progenitors | Proliferation and differentiation of B cells (Ig switching to IgG1 and IgE) and Th2 cells (anti-inflammatory by inhibiting Th1 immune responses); stimulates VCAM-1 |
| <i>III- Increased levels (median and interquartile)</i> |                                         |                                                                 |                                                                                                                                                                     |
| IL-6 (pg./ml)                                           | Macrophages, EC, SMC, T cells           | T & B cells, hepatocytes, EC, SMC                               | Differentiation of myeloid cells, induction of acute phase proteins, SMC proliferation                                                                              |
| IL-8 (pg./ml)                                           | Monocytes, EC, T cells                  | Neutrophils, T cells, monocytes                                 | Proinflammatory, promotes leukocyte arrest                                                                                                                          |
| IFN- $\gamma$ (pg./ml)                                  | Th1 cells, NK cells, SMC                | Macrophages, lymphocytes, NK cells, EC, SMC                     | Proinflammatory, promotes Th1 immune responses/secretion of Th1-associated cytokines, inhibits extracellular matrix synthesis by SMC                                |
| IL-1 $\beta$ (pg./ml)                                   | Activated T cells                       | Macrophages, T & B cells, NK cells                              | T-cell growth factor, stimulates NK activity, stimulates Treg cells                                                                                                 |
| TNF- $\alpha$ (pg./ml)                                  | Macrophages, T & B cells, NK cells, SMC | Many cell types                                                 | Proinflammatory, fever, neutrophil activation, bone resorption, anticoagulant, tumour necrosis                                                                      |
